# Supplementary material for: On the structural aspects of solid solutions of enantiomers: an intriguing case study of enantiomer recognition in the solid state
Source: Royal Society of Chemistry journal article supplement (doi:10.1039/c8ce01245h), 2018-01-01

# On the Structural Aspects of Solid Solutions of Enantiomers: An Intriguing Case Study of Enantiomer Recognition in the Solid State

Toms Reķis\* and Agris Bērziņš

Department of Physical Chemistry, University of Latvia, Riga, Latvia

\* [toms.rekis@lu.lv](mailto:toms.rekis@lu.lv)

1. Calculated unit cell volume of *rac*-A samples vs. suspending time in boiling nitromethane

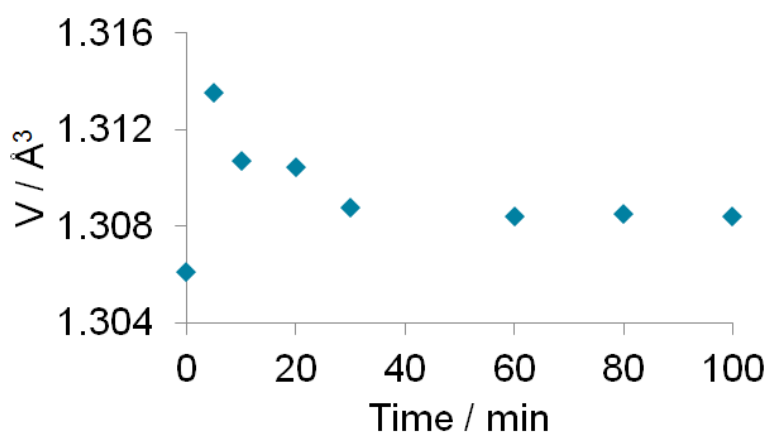

2. Simulated solid-state <sup>13</sup>C NMR spectra of the hypothetical structures *rac*-AI and *rac*-AII.

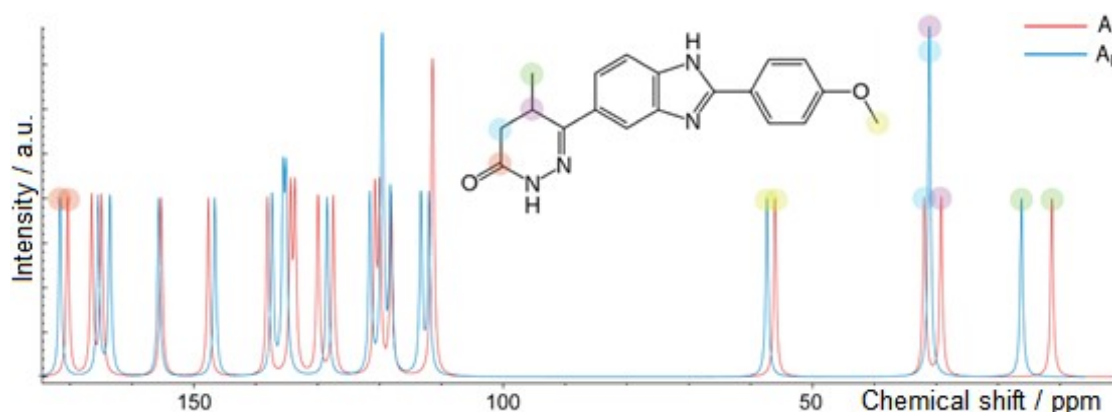

Supplement: c8ce01245h1.pdf [file c8ce01245h1.pdf]
